# Supplementary material for: Assemblage Characteristics and Habitat Specificity of Carabid Beetles in a Japanese Alpine-Subalpine Zone
Source: Hindawi journal article supplement (doi:10.1155/2018/9754376), 2018-01-01
Supplement: f1 [file 9754376.f1.doc]

**Psyche: A Journal of Entomology**

**Type of paper: Research Article**

**Supplementary Materials**

**Assemblage characteristics and habitat specificity of carabid beetles in a Japanese alpine–subalpine zone**

**Shinichi Hiramatsu1,2 and Nisikawa Usio1,3**

***1Graduate School of Natural Science and Technology, Kanazawa University, Kanazawa 920-1192, Japan***

***2Hakusan Nature Conservation Center, Hakusan 920-2132, Japan***

***3Institute of Nature and Environmental Technology, Kanazawa University, Kanazawa 920-1192, Japan***

**Correspondence should be addressed to Nisikawa Usio; usio@se.kanazawa-u.ac.jp**

**Table S1.** Summary results of analysis of variances (ANOVAs) of environmental variables among four habitats in the alpine–subalpine zone on Mt. Hakusan in central Japan. Repeated measures ANOVAs were used to test differences in soil water content, ground surface temperature, diurnal temperature range, and vegetation cover among the four habitats. One-way ANOVA was used to test the difference in mean substrate size among the four habitats.

| Variable | Source | Type III SS | df | MS | *F* | *P* value | |
| --- | --- | --- | --- | --- | --- | --- | --- |
| Soil water content | Habitat | 12285.83 | 3 | 4095.28 | 13.81 | 0.003 | ** |
| Error | 2076.05 | 7 | 296.58 |  |  |  |
| Day | 1321.83 | 5 | 264.37 | 21.26 | <0.001 | *** |
| Habitat × day | 793.12 | 15 | 52.87 | 4.25 | <0.001 | *** |
|  | Error | 435.14 | 35 | 12.43 |  |  |  |
| Ground surface temperature | Habitat | 22.23 | 3 | 7.41 | 2.60 | 0.135 |  |
| Error | 19.96 | 7 | 2.85 |  |  |  |
| Day | 415.33 | 5 | 83.07 | 107.65 | <0.001 | *** |
| Habitat × day | 25.07 | 15 | 1.67 | 2.17 | 0.030 | ** |
|  | Error | 27.01 | 35 | 0.77 |  |  |  |
| Diurnal temperature range | Habitat | 143.74 | 3 | 47.91 | 6.58 | 0.019 | ** |
| Error | 51.00 | 7 | 7.29 |  |  |  |
| Day | 71.10 | 5 | 14.22 | 16.87 | <0.001 | *** |
| Habitat × day | 21.27 | 15 | 1.42 | 1.68 | 0.180 |  |
|  | Error | 29.51 | 35 | 0.84 |  |  |  |
| Vegetation cover | Habitat | 1115.80 | 3 | 371.93 | 46.42 | <0.001 | *** |
| Error | 56.09 | 7 | 8.01 |  |  |  |
| Day | 65.77 | 5 | 13.15 | 28.71 | <0.001 | *** |
| Habitat × day | 73.41 | 15 | 4.89 | 10.68 | <0.001 | *** |
|  | Error | 16.03 | 35 | 0.46 |  |  |  |
| Mean substrate size | Habitat | 55.29 | 3 | 18.43 | 8.24 | 0.011 | ** |
| Error | 15.65 | 7 | 2.24 |  |  |  |

** *P* < 0.01, *** *P* < 0.001

**Table S2.** Numbers of individuals (per 20 baited pitfall traps) of carabid beetles collected at 11 sites in snow beds (SB), alpine meadows (AM), *Pinus* scrub (PS), and fellfields (FF) in the alpine–subalpine zone on Mt. Hakusan. The numbers following the abbreviations of each habitat are the site numbers.

| July 15 | |  |  |  |  |  |  |  |  |  |  |  |
| --- | --- | --- | --- | --- | --- | --- | --- | --- | --- | --- | --- | --- |
|  | Species | SB1 | SB2 | SB3 | AM1 | AM2 | PS1 | PS2 | PS3 | FF1 | FF2 | FF3 |
|  | *Leptocarabus arboreus* |  |  | 5 | 1 |  | 3 | 1 | 4 | 8 | 5 | 5 |
|  | *Leptocarabus procelurus* |  |  |  |  |  |  |  |  |  |  |  |
|  | *Leistus subaeneus* |  |  |  |  |  |  |  | 1 |  |  |  |
|  | *Nippononebria pusilla* |  |  |  |  |  |  |  |  | 1 |  | 2 |
|  | *Nebria sadona* |  |  |  |  |  | 1 |  |  |  |  |  |
|  | *Nebria reflexa* | 1 |  |  |  |  |  |  |  |  |  |  |
|  | *Trechiama lewisi* | 1 | 1 |  |  |  |  |  |  |  |  |  |
|  | *Trechus* sp. |  |  |  |  |  |  |  |  |  |  |  |
|  | *Bembidion fujiyamai* |  | 10 |  |  |  |  |  |  |  |  |  |
|  | *Bembidion* sp. | 14 | 64 | 150 | 10 | 48 |  |  |  | 26 | 15 | 9 |
|  | *Diplous depressus* |  |  |  |  |  |  |  |  |  |  |  |
|  | *Apatrobus hasemiya* |  |  |  |  |  |  |  |  |  |  |  |
|  | *Platynus kitanoi* |  |  | 2 |  |  |  | 1 | 10 | 11 | 6 |  |
|  | *Platynus* sp. | 26 | 1 | 12 | 22 | 27 |  |  |  |  |  |  |
|  | *Colpodes xestus* |  |  | 1 |  |  | 3 |  | 2 | 5 | 2 |  |
|  | *Trigonognatha aurescens* |  |  |  |  |  | 2 |  | 2 | 1 |  | 1 |
|  | *Pterostichus honshuensis* | 7 | 2 | 6 | 7 | 3 |  |  |  |  |  |  |
|  | *Pterostichus janoi* |  |  |  | 2 |  | 2 | 6 | 1 |  |  |  |
|  | *Pristosia aeneola* |  |  |  |  |  |  |  |  |  |  |  |
|  | *Synuchus takeuchii* |  |  |  |  |  |  |  |  |  |  |  |
|  | *Trephionus kinoshitai* |  |  |  |  |  |  |  |  |  |  |  |
|  | *Harpalus fuliginosus* |  |  |  |  |  |  |  |  |  |  |  |
|  | *Trichotichnus* sp. |  |  | 1 |  |  |  |  |  |  |  |  |
| July 24 | |  |  |  |  |  |  |  |  |  |  |  |
|  | Species | SB1 | SB2 | SB3 | AM1 | AM2 | PS1 | PS2 | PS3 | FF1 | FF2 | FF3 |
|  | *Leptocarabus arboreus* | 1 |  | 3 |  |  | 4 | 2 | 4 | 7 | 7 | 2 |
|  | *Leptocarabus procelurus* |  |  |  |  |  |  |  |  |  |  |  |
|  | *Leistus subaeneus* |  |  |  |  |  | 1 |  | 1 |  |  |  |
|  | *Nippononebria pusilla* |  |  |  |  |  |  |  |  | 2 |  |  |
|  | *Nebria sadona* |  |  |  |  |  |  |  |  |  |  |  |
|  | *Nebria reflexa* |  |  |  |  |  |  |  |  |  |  |  |
|  | *Trechiama lewisi* |  |  |  |  |  |  |  |  |  |  |  |
|  | *Trechus* sp. |  |  |  |  |  |  |  |  | 5 | 3 | 1 |
|  | *Bembidion fujiyamai* |  |  |  |  | 1 |  |  |  |  |  |  |
|  | *Bembidion* sp. | 6 | 7 | 23 | 2 | 31 |  |  |  | 8 | 10 | 1 |
|  | *Diplous depressus* |  |  |  |  |  |  |  |  |  |  |  |
|  | *Apatrobus hasemiya* |  |  |  |  |  |  |  |  |  |  |  |
|  | *Platynus kitanoi* |  |  |  |  |  |  | 2 | 7 |  |  |  |
|  | *Platynus* sp. | 4 | 1 | 5 | 11 | 11 |  |  |  |  |  |  |
|  | *Colpodes xestus* | 1 |  |  |  |  | 2 | 2 | 7 | 11 | 23 | 3 |
|  | *Trigonognatha aurescens* |  |  |  |  |  |  |  |  |  |  |  |
|  | *Pterostichus honshuensis* | 5 | 1 |  | 2 |  |  |  |  |  |  |  |
|  | *Pterostichus janoi* | 1 |  |  |  | 1 | 9 | 8 | 3 |  |  |  |
|  | *Pristosia aeneola* |  |  |  |  | 1 |  |  |  |  |  |  |
|  | *Synuchus takeuchii* |  |  |  |  |  |  |  |  |  |  |  |
|  | *Trephionus kinoshitai* |  |  |  |  |  |  |  |  |  |  |  |
|  | *Harpalus fuliginosus* |  |  |  |  |  |  |  |  | 2 |  |  |
|  | *Trichotichnus* sp. |  |  |  |  |  |  |  |  |  |  |  |
| August 13 | |  |  |  |  |  |  |  |  |  |  |  |
|  | Species | SB1 | SB2 | SB3 | AM1 | AM2 | PS1 | PS2 | PS3 | FF1 | FF2 | FF3 |
|  | *Leptocarabus arboreus* | 1 |  |  |  | 1 |  | 1 | 4 | 8 | 3 | 1 |
|  | *Leptocarabus procelurus* |  |  |  |  |  |  |  |  |  |  |  |
|  | *Leistus subaeneus* |  |  |  |  |  |  |  |  |  |  |  |
|  | *Nippononebria pusilla* |  |  |  |  |  |  |  |  | 1 |  |  |
|  | *Nebria sadona* |  |  |  |  |  | 1 |  |  |  |  |  |
|  | *Nebria reflexa* |  |  |  |  |  |  |  |  |  |  |  |
|  | *Trechiama lewisi* |  |  |  |  |  |  |  |  |  |  |  |
|  | *Trechus* sp. |  |  |  |  |  |  |  |  |  |  |  |
|  | *Bembidion fujiyamai* |  |  |  |  |  |  |  |  |  |  |  |
|  | *Bembidion* sp. | 2 | 2 | 1 |  | 1 |  |  |  |  |  |  |
|  | *Diplous depressus* |  |  |  |  |  |  |  |  |  |  |  |
|  | *Apatrobus hasemiya* |  |  |  |  |  |  |  |  |  |  |  |
|  | *Platynus kitanoi* |  |  |  |  |  |  |  |  | 3 | 1 |  |
|  | *Platynus* sp. |  | 1 | 1 |  | 2 |  |  |  |  |  |  |
|  | *Colpodes xestus* |  |  |  |  |  |  |  | 3 | 8 | 2 | 1 |
|  | *Trigonognatha aurescens* |  |  |  | 1 |  |  |  |  |  |  |  |
|  | *Pterostichus honshuensis* |  |  |  | 3 | 1 |  |  |  |  |  |  |
|  | *Pterostichus janoi* |  |  |  |  | 1 | 1 | 1 |  |  |  |  |
|  | *Pristosia aeneola* |  |  |  |  |  |  |  |  |  |  |  |
|  | *Synuchus takeuchii* |  |  |  |  |  |  |  |  |  |  |  |
|  | *Trephionus kinoshitai* |  |  |  |  |  | 1 |  |  |  |  |  |
|  | *Harpalus fuliginosus* |  |  |  |  |  |  |  |  |  |  |  |
|  | *Trichotichnus* sp. |  |  |  |  |  |  |  |  |  |  |  |

| August 27 | |  |  |  |  |  |  |  |  |  |  |  |
| --- | --- | --- | --- | --- | --- | --- | --- | --- | --- | --- | --- | --- |
|  | Species | SB1 | SB2 | SB3 | AM1 | AM2 | PS1 | PS2 | PS3 | FF1 | FF2 | FF3 |
|  | *Leptocarabus arboreus* |  |  | 2 | 2 | 1 |  |  |  | 3 |  | 2 |
|  | *Leptocarabus procerulus* | 1 |  |  | 1 |  |  |  |  |  |  |  |
|  | *Leistus subaeneus* |  |  |  |  |  |  |  | 2 |  |  |  |
|  | *Nippononebria pusilla* |  |  |  |  |  |  |  |  | 7 | 1 |  |
|  | *Nebria sadona* |  |  |  |  |  | 1 |  |  |  |  |  |
|  | *Nebria reflexa* | 1 |  |  |  |  |  |  |  |  |  |  |
|  | *Trechiama lewisi* |  |  |  |  |  |  |  |  |  |  |  |
|  | *Trechus* sp. |  |  |  |  |  |  |  |  |  |  |  |
|  | *Bembidion fujiyamai* |  |  |  |  |  |  |  |  |  | 1 |  |
|  | *Bembidion* sp. |  | 1 |  |  |  |  |  |  | 2 |  |  |
|  | *Diplous depressus* |  |  |  |  |  |  |  |  |  |  |  |
|  | *Apatrobus hasemiya* |  |  |  |  |  |  |  |  |  |  |  |
|  | *Platynus kitanoi* |  |  |  |  |  |  |  |  |  |  | 1 |
|  | *Platynus* sp. |  |  |  |  |  |  |  |  |  |  |  |
|  | *Colpodes xestus* |  |  |  |  |  |  |  |  |  |  | 1 |
|  | *Trigonognatha aurescens* |  |  | 1 |  |  |  |  |  |  |  |  |
|  | *Pterostichus honshuensis* | 2 | 1 |  |  | 1 |  |  |  | 1 |  |  |
|  | *Pterostichus janoi* |  |  |  |  |  | 1 | 2 | 1 |  |  |  |
|  | *Pristosia aeneola* |  |  |  |  |  |  |  |  |  |  |  |
|  | *Synuchus takeuchii* | 2 |  |  |  |  |  | 1 |  |  |  |  |
|  | *Trephionus kinoshitai* |  |  |  |  |  |  |  |  |  |  |  |
|  | *Harpalus fuliginosus* |  |  |  |  |  |  |  |  |  |  |  |
|  | *Trichotichnus* sp. |  |  |  |  |  |  |  |  |  |  |  |

| September 11 | |  | |  | |  | |  | |  | |  | |  | |  | |  | |  | |  | |
| --- | --- | --- | --- | --- | --- | --- | --- | --- | --- | --- | --- | --- | --- | --- | --- | --- | --- | --- | --- | --- | --- | --- | --- |
|  | Species | | SB1 | | SB2 | | SB3 | | AM1 | | AM2 | | PS1 | | PS2 | | PS3 | | FF1 | | FF2 | | FF3 |
|  | *Leptocarabus arboreus* | |  | | 2 | |  | | 1 | | 1 | |  | | 1 | |  | |  | |  | | 2 |
|  | *Leptocarabus procerulus* | |  | |  | |  | |  | |  | |  | |  | |  | |  | |  | |  |
|  | *Leistus subaeneus* | |  | |  | |  | |  | |  | |  | |  | |  | |  | |  | |  |
|  | *Nippononebria pusilla* | |  | |  | |  | |  | |  | |  | |  | |  | |  | |  | | 1 |
|  | *Nebria sadona* | |  | |  | |  | |  | |  | |  | |  | |  | |  | |  | |  |
|  | *Nebria reflexa* | |  | |  | |  | |  | |  | |  | |  | |  | |  | |  | |  |
|  | *Trechiama lewisi* | |  | |  | |  | |  | |  | |  | |  | |  | |  | |  | |  |
|  | *Trechus* sp. | |  | |  | |  | |  | |  | |  | |  | |  | | 1 | |  | |  |
|  | *Bembidion fujiyamai* | |  | |  | |  | |  | |  | |  | |  | |  | |  | |  | |  |
|  | *Bembidion* sp. | |  | | 1 | | 2 | |  | |  | |  | |  | |  | | 1 | |  | | 1 |
|  | *Diplous depressus* | |  | |  | |  | |  | |  | |  | |  | |  | |  | |  | |  |
|  | *Apatrobus hasemiya* | | 1 | |  | |  | |  | |  | |  | |  | |  | |  | |  | |  |
|  | *Platynus kitanoi* | |  | |  | |  | |  | |  | |  | |  | |  | |  | |  | |  |
|  | *Platynus* sp. | | 1 | |  | |  | |  | | 2 | |  | |  | |  | |  | |  | |  |
|  | *Colpodes xestus* | |  | |  | |  | |  | |  | |  | |  | |  | | 1 | | 1 | |  |
|  | *Trigonognatha aurescens* | |  | | 1 | |  | |  | |  | |  | |  | | 1 | |  | |  | |  |
|  | *Pterostichus honshuensis* | |  | |  | |  | | 2 | | 1 | |  | |  | |  | |  | |  | |  |
|  | *Pterostichus janoi* | |  | |  | |  | |  | |  | | 2 | |  | | 1 | |  | |  | |  |
|  | *Pristosia aeneola* | |  | |  | |  | |  | |  | |  | |  | |  | |  | |  | |  |
|  | *Synuchus takeuchii* | |  | |  | |  | | 1 | |  | |  | | 1 | |  | |  | |  | |  |
|  | *Trephionus kinoshitai* | |  | |  | |  | |  | |  | | 1 | |  | |  | |  | |  | |  |
|  | *Harpalus fuliginosus* | |  | |  | |  | |  | |  | |  | |  | |  | |  | |  | |  |
|  | *Trichotichnus* sp. | |  | |  | |  | |  | |  | |  | |  | |  | |  | |  | |  |
| September 23 | |  | |  | |  | |  | |  | |  | |  | |  | |  | |  | |  | |
|  | Species | | SB1 | | SB2 | | SB3 | | AM1 | | AM2 | | PS1 | | PS2 | | PS3 | | FF1 | | FF2 | | FF3 |
|  | *Leptocarabus arboreus* | |  | |  | |  | | 2 | | 1 | |  | |  | |  | |  | |  | | 1 |
|  | *Leptocarabus procerulus* | |  | |  | |  | |  | |  | |  | |  | |  | |  | |  | |  |
|  | *Leistus subaeneus* | |  | |  | |  | |  | |  | |  | |  | | 4 | |  | |  | |  |
|  | *Nippononebria pusilla* | |  | |  | |  | |  | |  | |  | |  | |  | |  | | 1 | |  |
|  | *Nebria sadona* | |  | |  | |  | |  | |  | |  | |  | |  | |  | |  | |  |
|  | *Nebria reflexa* | | 1 | |  | |  | |  | |  | |  | |  | |  | |  | |  | |  |
|  | *Trechiama lewisi* | |  | |  | |  | |  | |  | |  | |  | |  | |  | | 1 | |  |
|  | *Trechus* sp. | |  | |  | |  | |  | |  | |  | |  | |  | |  | |  | |  |
|  | *Bembidion fujiyamai* | |  | | 3 | |  | |  | |  | |  | |  | |  | |  | |  | |  |
|  | *Bembidion* sp. | |  | | 2 | | 2 | |  | | 2 | |  | |  | |  | | 5 | | 9 | | 1 |
|  | *Diplous depressus* | | 1 | |  | |  | |  | |  | |  | |  | |  | |  | |  | |  |
|  | *Apatrobus hasemiya* | |  | |  | |  | |  | |  | | 1 | |  | |  | |  | |  | |  |
|  | *Platynus kitanoi* | |  | |  | |  | |  | |  | |  | | 1 | | 1 | |  | |  | |  |
|  | *Platynus* sp. | | 1 | |  | |  | | 3 | |  | |  | |  | |  | |  | |  | |  |
|  | *Colpodes xestus* | |  | |  | |  | |  | |  | |  | |  | |  | | 1 | |  | |  |
|  | *Trigonognatha aurescens* | |  | |  | |  | |  | |  | |  | |  | |  | |  | |  | |  |
|  | *Pterostichus honshuensis* | |  | |  | |  | |  | |  | |  | |  | |  | |  | |  | |  |
|  | *Pterostichus janoi* | |  | |  | |  | |  | |  | | 1 | | 2 | | 1 | |  | |  | |  |
|  | *Pristosia aeneola* | |  | |  | |  | |  | |  | |  | |  | |  | |  | |  | |  |
|  | *Synuchus takeuchii* | | 1 | |  | |  | | 1 | |  | |  | |  | |  | |  | |  | |  |
|  | *Trephionus kinoshitai* | |  | |  | |  | |  | |  | |  | |  | |  | |  | |  | |  |
|  | *Harpalus fuliginosus* | |  | |  | |  | |  | |  | |  | |  | |  | |  | |  | |  |
|  | *Trichotichnus* sp. | |  | |  | |  | |  | |  | |  | |  | |  | |  | |  | |  |

| Total abundance | |  |  |  |  |  |  |  |  |  |  |  |
| --- | --- | --- | --- | --- | --- | --- | --- | --- | --- | --- | --- | --- |
|  | Species | SB1 | SB2 | SB3 | AM1 | AM2 | PS1 | PS2 | PS3 | FF1 | FF2 | FF3 |
|  | *Leptocarabus arboreus* | 2 | 2 | 10 | 6 | 4 | 7 | 5 | 12 | 26 | 15 | 13 |
|  | *Leptocarabus procerulus* | 1 |  |  | 1 |  |  |  |  |  |  |  |
|  | *Leistus subaeneus* |  |  |  |  |  | 1 |  | 8 |  |  |  |
|  | *Nippononebria pusilla* |  |  |  |  |  |  |  |  | 11 | 2 | 3 |
|  | *Nebria sadona* |  |  |  |  |  | 3 |  |  |  |  |  |
|  | *Nebria reflexa* | 3 |  |  |  |  |  |  |  |  |  |  |
|  | *Trechiama lewisi* | 1 | 1 |  |  |  |  |  |  |  | 1 |  |
|  | *Trechus* sp. |  |  |  |  |  |  |  |  | 6 | 3 | 1 |
|  | *Bembidion fujiyamai* |  | 13 |  |  | 1 |  |  |  |  | 1 |  |
|  | *Bembidion* sp. | 22 | 77 | 178 | 12 | 82 |  |  |  | 42 | 34 | 12 |
|  | *Diplous depressus* | 1 |  |  |  |  |  |  |  |  |  |  |
|  | *Apatrobus hasemiya* | 1 |  |  |  |  | 1 |  |  |  |  |  |
|  | *Platynus kitanoi* |  |  | 2 |  |  |  | 4 | 8 | 14 | 7 | 1 |
|  | *Platynus* sp. | 32 | 3 | 18 | 36 | 42 |  |  |  |  |  |  |
|  | *Colpodes xestus* | 1 |  | 1 |  |  | 5 | 2 | 12 | 26 | 28 | 5 |
|  | *Trigonognatha aurescens* |  | 1 | 1 | 1 |  | 2 |  | 3 | 1 |  | 1 |
|  | *Pterostichus honshuensis* | 14 | 4 | 6 | 14 | 6 |  |  |  | 1 |  |  |
|  | *Pterostichus janoi* | 1 |  |  | 2 | 2 | 16 | 19 | 7 |  |  |  |
|  | *Pristosia aeneola* |  |  |  |  | 1 |  |  |  |  |  |  |
|  | *Synuchus takeuchii* | 3 |  |  | 2 |  |  | 2 |  |  |  |  |
|  | *Trephionus kinoshitai* |  |  |  |  |  | 2 |  |  |  |  |  |
|  | *Harpalus fuliginosus* |  |  |  |  |  |  |  |  | 2 |  |  |
|  | *Trichotichnus* sp. |  |  | 1 |  |  |  |  |  |  |  |  |
